# Supplementary material for: Climatology of intermediate descending layers (150 km) over the equatorial and low latitude regions of Brazil during the deep solar minimum of 2009
Source: Copernicus journal article supplement (doi:10.5194/angeo-2019-74), 2019-05-24
Supplement: Supplementary file [file angeo-2019-74-AC1-supplement.pdf]

# Climatology of intermediate descending layers (or 150-km echoes) over the equatorial and low latitude regions of Brazil during the deep solar minimum of 2009

Ângela M. Santos<sup>1</sup>, Inez S. Batista<sup>1</sup>, Mangalathayil A. Abdu<sup>1,2</sup>, José .H. A. Sobral<sup>1</sup>, Jonas. R. Souza<sup>1</sup>

5 <sup>1</sup>National Institute for Space Research (INPE) S. J. Campos, SP, Brazil

<sup>2</sup> Instituto Tecnológico de Aeronáutica, DCTA, São José dos Campos, Brazil

*Correspondence to:* Ângela M. Santos (angela.santos@inpe.br, angelasantos\_1@yahoo.com.br)

## Abstract

10

In this work, we **have performed a study** for the first time on the climatology of intermediate descending layers (IL's) over Brazilian equatorial and low latitudes regions during the extreme solar minimum period of 2009. **The result of this study shows** that the occurrence frequency of the IL's is very high, being >60% over São Luís (2 ° S; 44 ° W, I: -5.7°) and >90% in Cachoeira Paulista (22.42 ° S; 45 ° W, I: -34.4°). In most cases the IL's occur during the day at altitudes varying from 130 to 180 km and **they may** descend to lower altitudes (~100 km) in a time interval of a few minutes to hours. **The main driving force for the IL's at the low latitude region, may be considered to be the diurnal tide (24 h)** followed in smaller dominance **by the** semidiurnal (12h), terdiurnal (8h) and quarter-diurnal (6h) components. **The** semidiurnal tide, **however**, does not appear to influence the IL's dynamics except in summer. **Additionally,**

15 **the** IL's mean descent velocities over São Luís and Cachoeira Paulista show a day-to-day variability that may be associated with **the presence of** gravity waves. Some peculiarities in the IL's dynamics **were** noted, such as the presence of the IL's during the night hours. **Ascending and descending IL's appeared to have been** formed from some connection with the ionospheric F layer. Quite often, these characteristics are observed in the presence of strong signatures in the ionogram F-layer trace **suggesting** gravity wave

20 **propagation.** The descending intermediate layer over Brazil can be formed through a process of F1 layer base detachment. **An interesting case study showed that** an ascending IL's, initially detected at ~ 140 km, reached the base of **the** F2 layer, due **probably** to the gravity wave propagation and/or the effect of the prompt penetration electric field.

## 1 Introduction

The first observations on the existence of intermediate layers were reported in 1930s (Schafer and Goodall, 1933; Appleton, 1933; Ratcliffe and White, 1933). It was observed that this ionization layer, which is located between the E and F1 layers, occurred regularly in the height region of around 130 - 150 km. Since then, some studies have been carried out on the behavior of IL's over different longitude sectors using radar observations (Kudeki and Fawcett, 1993; Chau and Kudeki, 2006; Kudeki et al., 1998; Tsunoda and Ecklund 2004) and Ionosonde data (Rodger et al., 1981; MacDougall, 1974; MacDougall, 1978; Wilkinson et al., 1992; Szuszczewicz et al., 1995). Balsley (1964) showed that the existence of these layers located at ~150 km of altitude exhibited a downward movement during the daytime and ascending movement at dusk, with the intensity of the layer varying on a time scale of 5 to 15 minutes. Shen et al. (1976), observed that the IL's over Arecibo lasted for several hours. They also mentioned that in the valley region, the peak electronic density of the layer ranged from  $\sim 3 \times 10^2$  to  $1 \times 10^3 \text{ cm}^{-3}$ .

According to Fujitaka and Tohmatsu (1973), the S2 and S4 propagation mode of atmospheric tide can be the dominant cause of the intermediate layers at night over middle latitude. Over the equatorial region, the IL's can possibly be caused by gravity waves (Kudeki and Fawcett, 1993). However, some characteristics observed also suggested that the phase velocity along the line-of-sight must be controlled firstly by the large-scale electrodynamics effect (driven by tides) and secondarily by the gravity waves of short period.

Some particularities of the IL such as its seasonality and cause-effect relationships have been studied over many years. Mathews and Bekey (1979), for example, investigated the role of tidal winds in their diurnal and semidiurnal components in the formation of IL's and concluded that the tidal winds could play a key role in the generation of this phenomenon. Using Ionosonde data, MacDougall (1978) observed that the periodicity of the intermediate layers in the ionograms appeared to be related to semidiurnal oscillations. Mathews (1998) reported on the important role of the diurnal and semidiurnal tides in the generation and height descent of the intermediate layers over Arecibo. Tsunoda (1994)

suggested that a gravity wave wind driven interchange instability could be a possible generation mechanism of the field-aligned plasma irregularities responsible for the echoes received from the IL.

Regarding the study of IL's made with radar data, the first observations of the "150-km echoes" over Brazilian equatorial region were made by de Paula and Hyssel (2004). The radar echoes were identified at around 09 LT at ~ 165 km altitude, and at 12 LT the echoes descended to ~ 145 km. A gradual upward movement of the IL's reaching 160 km of altitude was observed in the following hours. At 14 LT the IL disappeared, presenting in this way a "collar" shape as observed in different longitudinal sectors. From the analysis of the RTI maps, Rodrigues et al. (2011) showed that the lowest rate of occurrence of the 150-km echoes in Brazil was during the March equinox, whereas the strongest and longest duration echoes were observed between June and September. Another important finding by Rodrigues et al. (2011) was that there was an apparent variability of the Doppler displacement with height, indicating that the IL's over Brazil might have a different formation mechanisms from those operative in other longitudinal sectors. The IL's observed with the 30 MHz radar at São Luís presented a thickness of 3 to 5 km and were located between 140 and 170 km of altitude.

In this paper, we present for the first time, the climatology of the intermediate layers over the equatorial and low latitude locations in Brazil during a period of extremely low solar activity. The important points to be discussed in this paper include the influence of atmospheric tides and gravity waves in the IL's dynamics and the possible contribution of disturbed electric fields in some specific cases. Some peculiarities found in the IL's characteristics over Brazil will also be discussed.

## 2 Methodology and data presentation

The observational data analyzed in this work were obtained from the Digisondes operated in São Luís – SL (2 ° S; 44 ° W, I: -5.7°) and Cachoeira Paulista - CP (22.42 ° S; 45 ° W, I: -34.4°) during the period of extreme solar minimum activity of 2009. For SL the data was analyzed from March to December and for CP from January to December. The local times at the two sites are:  $LT = UT - 3h$ . The following criteria were established in order to ubiquitously classify a certain layer as intermediate layer:

(a) When the critical frequency of the lower layer (extraordinary trace) exceeds the minimum frequency of the ordinary trace of F layer, the layer in question was considered as IL. Otherwise, the layer was classified as a regular E2 layer. Depending on the height of this layer, we carefully evaluated the identification of the IL case by case;

5 (b) In the cases in which the characteristics described in item (a) were not clear, a sequence of ionograms was used to classify the type of the layer;

(c) When a new layer appeared to be formed from a detachment of F1 layer, the IL was only considered when such detachment was total;

(d) For a descending layer to be classified as IL it should first occur at or above 130 km;

10 (e) When the studied layer was initially detected below 130 km, but in the sequence of the ionograms an ascending movement reaching  $h \geq 130$  km was observed, the layer was classified as an IL;

(f) The IL's height and frequency parameters were extracted from the extraordinary trace. Besides that, they were processed during their downward movement until they merged into the sporadic-E (Es) layers.

15 It is important to note that, according to the criteria mentioned above, the layers considered here as "intermediate" may have evolved into a normal c-type sporadic-E layer, for example. Figure 1 shows an example of an intermediate layer located at  $\sim 150$  km ( $h'_{IL}$ ) with a top frequency ( $f_{tIL}$ ) of 4.51 MHz. We can see that the minimum frequency of the F layer ( $\sim 4.1$  MHz) was lower than the top frequency of IL, thus satisfying the criteria described in item (a).

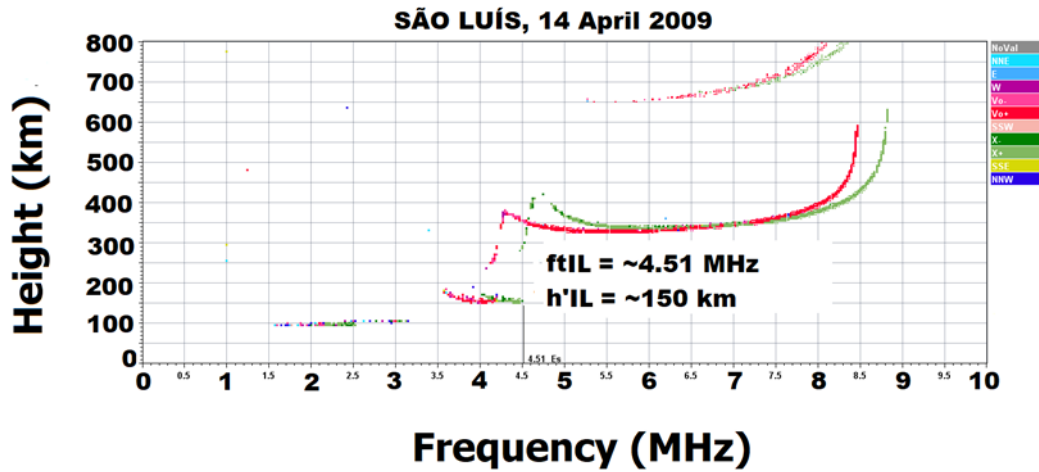

FIGURE 1: Ionogram over São Luis during 12 April 2009. The height (h'IL) and the top frequency (ftIL) of intermediate layer are indicated in this Figure.

### 5 3 Results and Discussion

Figure 2 presents the month-to-month variation of the percentage of occurrence of the intermediate layers over SL and CP. This analysis was performed based on the available data and the days with either ascending or **descending** intermediate layers, regardless **whether** they were observed more than once during a day or not. The upper panel of Fig. 2 shows the results for SL. It is interesting to observe the high occurrence rate (above 60%) during 2009 for this sector. In July and August, the occurrence reached 100%. Over Cachoeira Paulista, the high occurrence was even more pronounced throughout the period analyzed, reaching 100% in the months of April, June, July and December.

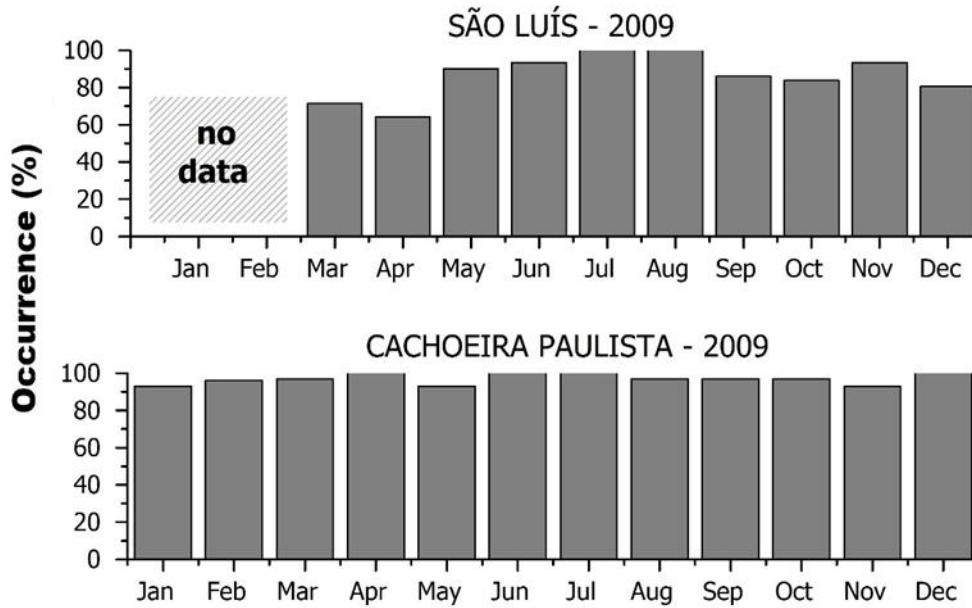

**FIGURE 2:** Monthly mean percentage occurrence of the descending intermediate layers for solar minimum period of 2009 at São Luís (upper panel) and Cachoeira Paulista (bottom panel). In upper panel the lack of data during January and February is marked.

5

### 3.1 Seasonal and diurnal variations

Figure 3 shows mass plots of the virtual height ( $h'_{IL}$ ) and top frequency ( $f_{tIL}$ ) of the intermediate layers as a function of time. The data sets were grouped into equinox (March-April; September-October), winter (May to August) and summer solstice (November to February) seasons. The data availability and occurrence of the IL's for these periods are summarized in Table 1. The main results of this analysis for SL and CP can be summarized as follows: **(a)** the IL is a phenomenon that occurs predominantly during the day; **(b)** in general the higher top frequencies are observed for the intermediate layers that descend in height starting at maximum height of 130 km; **(c)** Over São Luís, nocturnal intermediate layers were observed between 01 and 08 UT (22 and 05 LT) in the equinox and summer solstice, but not in the winter

during the same [period](#). A few cases were observed also after 21 UT. Over CP, the nocturnal IL's were observed between ~ 22 and 09 UT during the three seasons; **(d)** At dawn (~ 06 LT), the lowest average top frequency of the intermediate layers over SL was ~ 2.5 MHz during equinox and in summer, and ~ 2.1 MHz in winter solstice. In CP, these values were ~ 2.5 MHz in equinox, 2.1 MHz in summer and 1.9 MHz in winter; **(e)** Ascending and descending layers were observed at altitudes above 200 km during the equinox and winter over SL, but it is important to [observe](#) that the summer months are underrepresented due to the absence of data for January, February and some days in March. Over CP, it was possible to identify layers at altitudes slightly higher than 200 km during the three seasons. In all cases, during the interval between 05 and 07 LT (08-10 UT), the classification of the layers as IL's [turned out to be difficult](#) because this is the time in which the ionospheric E layer begins to be registered in the ionograms.

**Table 1:** Number of days used in our study

| SEASON          | NUMBER OF DAYS WITH AVAILABLE DATA |     | NUMBER OF DAYS WITH THE IL'S |     |
|-----------------|------------------------------------|-----|------------------------------|-----|
|                 | SL                                 | CP  | SL                           | CP  |
| Equinox         | 110                                | 118 | 85                           | 113 |
| Winter Solstice | 122                                | 123 | 117                          | 121 |
| Summer Solstice | 61                                 | 119 | 53                           | 114 |

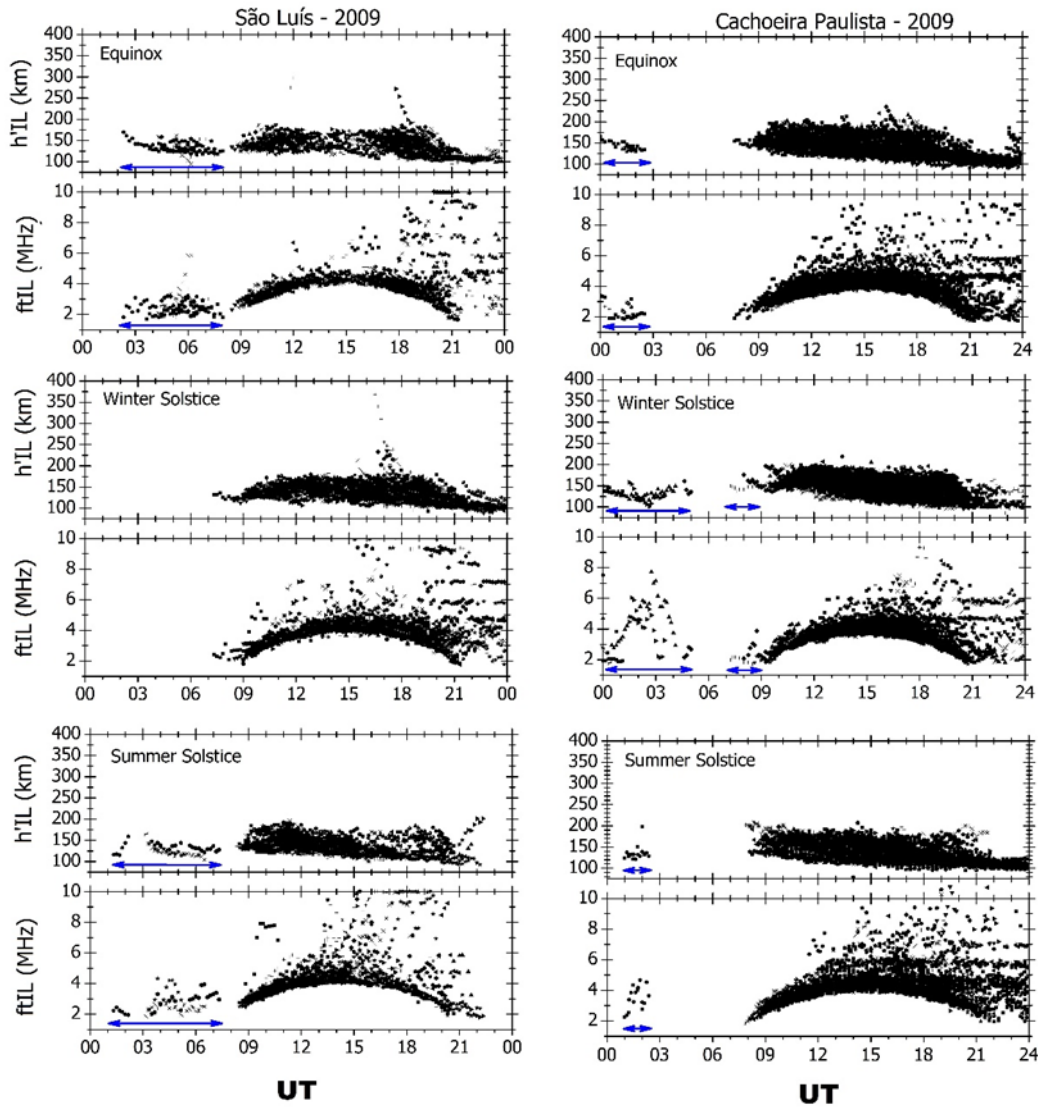

**FIGURE 3:** Time variation of intermediate layer parameters over São Luís and Cachoeira Paulista for different seasons. The horizontal blue arrow indicates the presence of nocturnal layers between 00 and 09 UT.

- 5 Figure 4 shows the diurnal variation of the IL's parameters over SL and CP for each day of the month. In Fig. 4a, we may note that in March, for example, of the 21 days analyzed, the presence and the absence of the intermediate layers was noted on 15 and 6 days, respectively. Besides that, it is interesting to observe that in many cases, the layer descended to heights less than 130 km after ~ 15 UT and 18 UT. In October, November and December, the layer descent started earlier, that is, soon after ~09 UT and 13



UT. The IL's were not observed in March and April between 12 and 15 UT. Over Cachoeria Paulista (Fig. 4b), it is possible to note the IL's tendency to reach altitudes below 130 km some hours earlier when compared with that over SL, except in Nov. and Dec.. The maximum limit of the vertical axes of Figures 4a and 4b was fixed at 200 km, but it is possible to see that on some days, the IL's were registered at altitudes much above this limit. In addition, in almost all the cases, the IL's were formed from 09 UT, at both SL and CP.

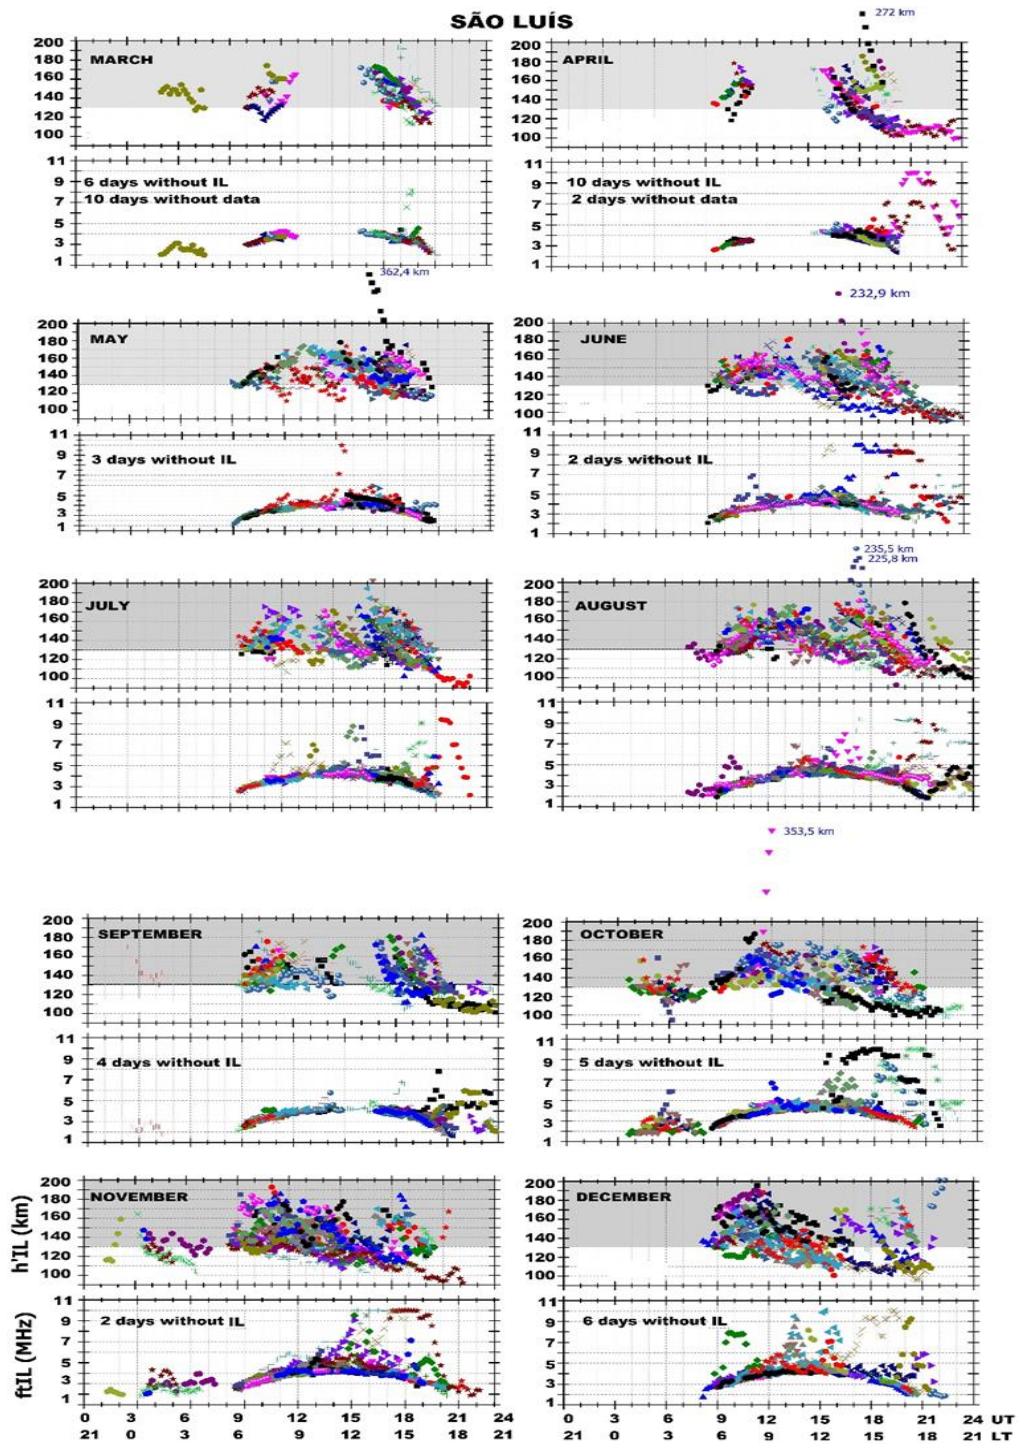

**FIGURE 4a:** Time variation of the virtual height ( $h'IL$ ) and top frequency of intermediate layers ( $ftIL$ ) over São Luís from March to December 2009. Information about the absence of IL's in each month is included in the plot. Different colors are used to represent the different days of each month.

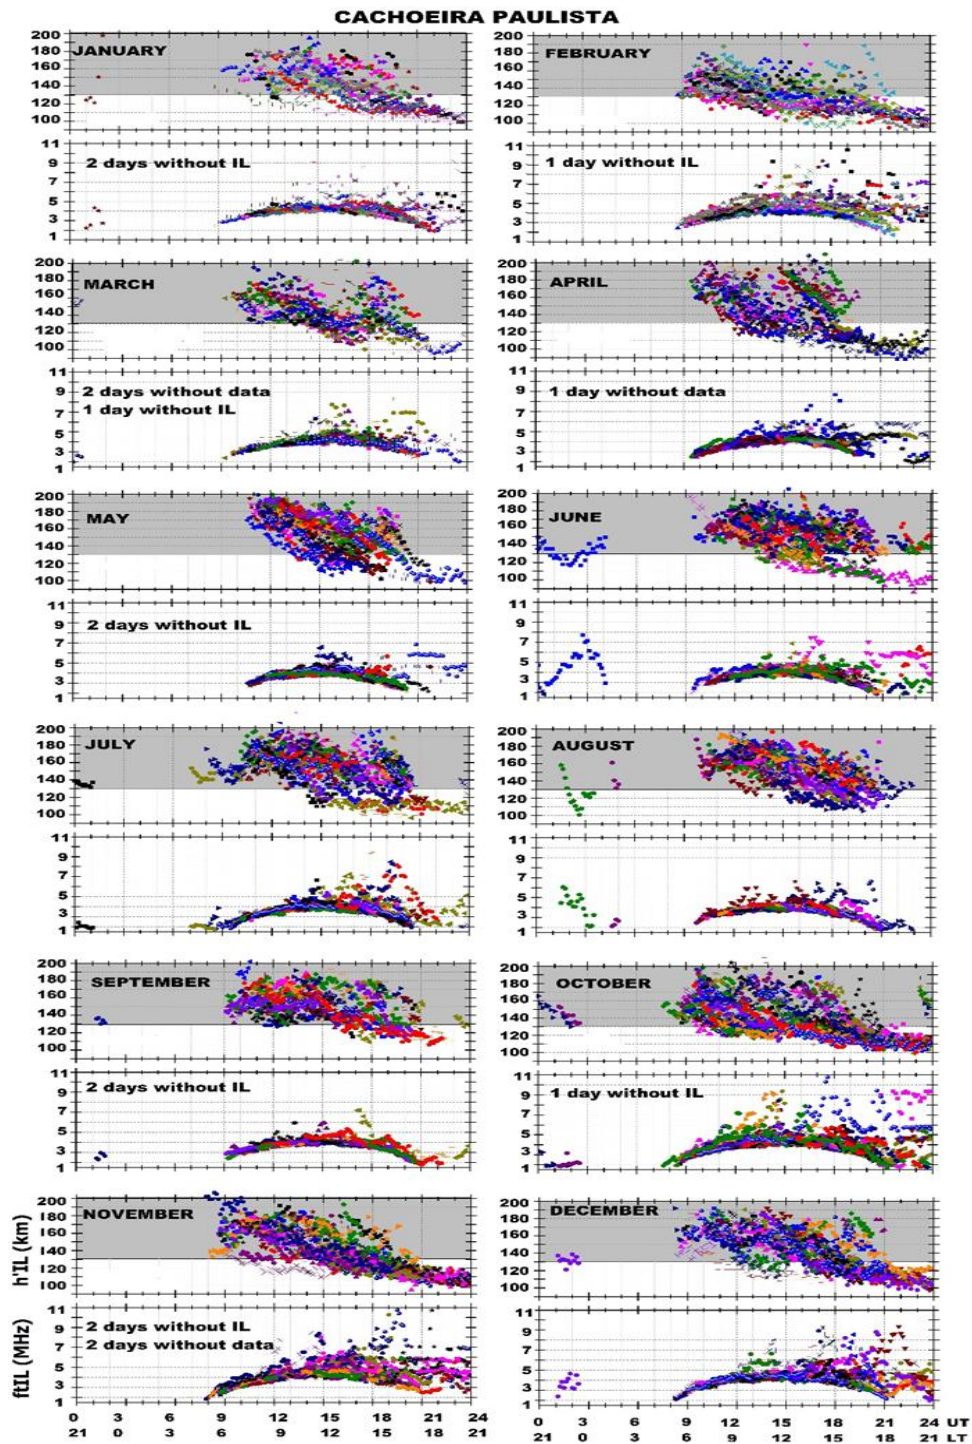

**FIGURE 4b:** Same as Figure 4a, but for Cachoeira Paulista from January to December 2009.

In general, the results presented in Figure 4 make it clear that the height at which the IL's are detected is quite variable and the behavior of the layer top frequency is very similar to that of the E-layer critical frequency with a maximum at noon. In most of the cases, the IL's present descending movements, but on some days, an ascending movement was also identified. Besides that, from careful examination of the figure, we may verify two types of IL's occurring at the same time; the IL's that may or may not descend to altitudes less than or equal to 130 km; the IL's that appear and disappear several times a day and the IL's that may be connected in some way with the F layer (that is, at  $h \geq 150$  km).

The analysis of Digisonde data presented here reveals, for the first time, a high frequency of occurrence rate of the IL's during the solar minimum period with some distinct features. Previous studies have shown that the IL's could result primarily from the wind shear processes driven by different tidal modes (Fijitaka and Tohmatsu, 1973; Mathews and Bekeeny, 1979; Tong et al., 1988). Using the MIRE model, Resende et al. (2017a, 2017b) verified that the diurnal component of the zonal wind is very important for the formation of the Es-layers (at 90-140 km) over Brazil; however, the descending movement is simulated only when the meridional wind is included in the model. Lee et al. (2003) reported that, at a Japanese location over the equatorial ionization anomaly, the semidiurnal tidal mode is dominant during spring and winter, while the quarterdiurnal mode prevails in summer/autumn. For an Indian station, Niranjana et al. (2010) observed a high occurrence probability of the IL's during winter, moderate occurrence rate during equinox and low occurrence during summer solstice.

As presented in Fig. 3, the occurrence of IL's over the equatorial and low latitudes regions does not present any seasonal preference, but the daily occurrence probability of the descending IL's showed

an interesting perspective. In Figure 5 we note that during the equinox, the IL's occurrence above 130 km over SL shows two maxima, one at 11 UT and other at 18 UT, each one with a probability of ~ 25-30%. Very small occurrence was observed during the night (~ 5%). Further, the occurrence of the descending layers predominantly during the daytime hours in Figure 5 appears to suggest the possibility of an important role of the E-layer dynamo on the dynamics of the descending layer. A similar behavior is observed in the winter solstice with an occurrence rate of ~ 35% in both peaks. In this case, the nocturnal IL's were not observed. In the summer months, only one dominant peak was observed at 12 UT with an occurrence probability of 60%. During the night, the occurrence was below 5%. Unlike over São Luís, the maximum probability of IL occurrence over Cachoeira Paulista was characterized by two broad peaks at around 12 UT and 15 UT for all periods analyzed and the frequency of occurrence varied between 50 and 70%.

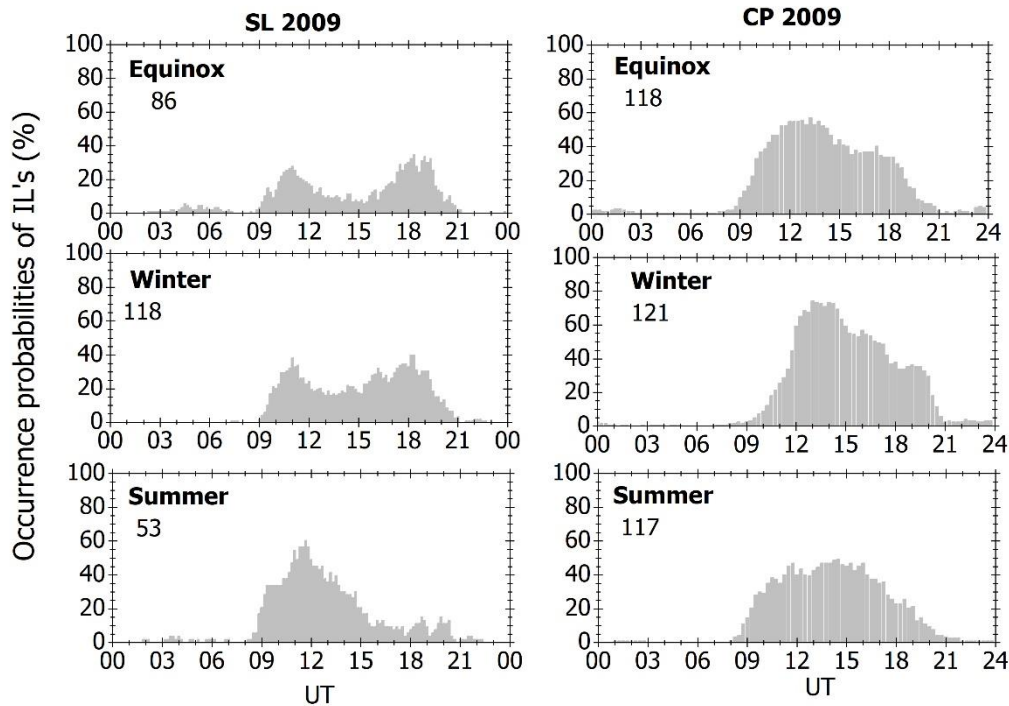

**FIGURE 5:** Occurrence probability of the intermediate layers ( $h \geq 130$  km) over SL and CP during 2009. In this plot, all the simultaneous IL's observed were considered. The number of occurrence of IL's is indicated in each panel.

It has been known from previous studies that the intermediate layers are influenced by the atmospheric tides, mainly by the semidiurnal mode. In order to investigate how these waves can affect the IL's dynamics over Brazil, we applied the fast Fourier transform analysis in the IL height parameter and found that the semidiurnal mode could influence the IL's mainly over Cachoeira Paulista. However, the dominant influence in all the cases, comes from the diurnal tide for both SL and CP. In this analysis, the data gaps, which indicate the non-occurrence of the IL (with exception in January and February for SL) were replaced by the number "zero". Figure 6 presents the result of FFT analysis of the IL heights for Sao Luis (top panel) and for Cachoeira Paulista (bottom panel). Over São Luis, the equatorial region,

the descending IL's present a well-defined diurnal periodicity in all seasons, followed by terdiurnal and quarterdiurnal modes. There is an exception in summer, when the contribution of semidiurnal mode is also evident. However, as mentioned previously the difficiency of data during January and February can affect this result. Similar to SL, the role of the diurnal tide is dominant over CP (see lower panel of Fig. 5 6), but the influence of semidiurnal mode was evident, mainly in the equinox and winter. A little influence from the terdiurnal and quarterdiurnal also can be identified during the equinox and winter. As mentioned by the Ninjaran et al (2010), the IL's formation is primarily controled by meridional and zonal wind driven shear forces, and the their day-to-day variability (as evidencied in Figures 4a and 4b), can be attributed to variations in the atmospheric tides, gravity waves, electric fields and metallic ions 10 populations.

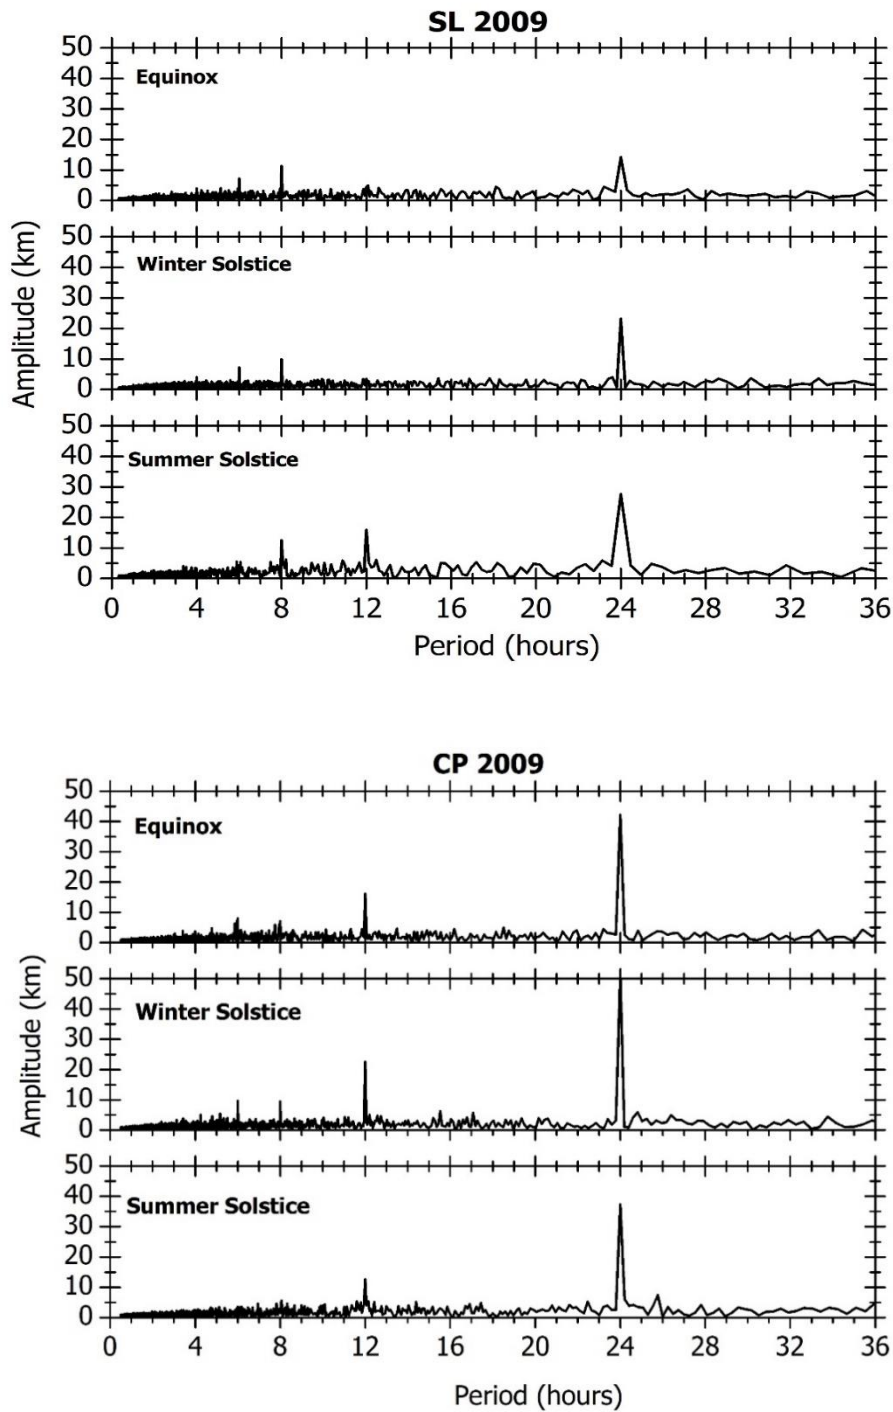

**FIGURE 6:** The FFT analysis of the intermediate layers height recorded at SL (top) and CP (bottom) during 2009.



The results of Figure 6 reveal that the influence of atmospheric tides in the formation/development of intermediate layers seems to have a latitudinal variation, being higher over Cachoeira Paulista than over São Luis. This behavior is in accordance with Andrioli et al. (2009a), who showed, for example, that the diurnal tidal amplitude over the low latitude regions of Cachoeira Paulista (CP) and Santa Maria (SM) is higher when compared to the amplitudes over the equatorial site, São João do Cariri (or São Luis). Whilst the zonal component of the wind presented a semiannual variation over Cariri (maximum at the equinox) and annual and semiannual variation over CP and SM, the meridional component presented semiannual pattern over the three locations studied. Resende et al. (2017a, 2017b) also reported that the amplitudes of the meridional and zonal winds over Cachoeira Paulista are higher than over São João do Cariri. More information about the variability of meridional and zonal winds and their diurnal and semidiurnal oscillations over Brazilian regions can be found in Batista et al. (2004), Lima et al. (2007), Buriti et al (2008) and Andrioli et al. (2009b).

### 3.2 Nocturnal intermediate layers

The occurrence of nocturnal intermediate layers was one of the peculiarities found in our studies. Over São Luís, the highest number of cases was detected between October and November. Figure 7a shows some examples of the nocturnal IL's occurring between 0120 UT (2220 LT) and 0830 UT (0530 LT) over SL. The times in the ionograms do not necessarily indicate the exact moment in which the intermediate layer was formed, but they indicate the times at which they could be better visualized. It is interesting to note that in these examples, the nocturnal layers exhibited a similar shape in almost all

cases, with a straight and “spreading” base appearance. The height/top frequency of these layers varied between ~ 130 and 170 km / 2.2 and 3.5 MHz. Similar to the diurnal intermediate layers, the nocturnal layers also had descending and ascending characteristics.

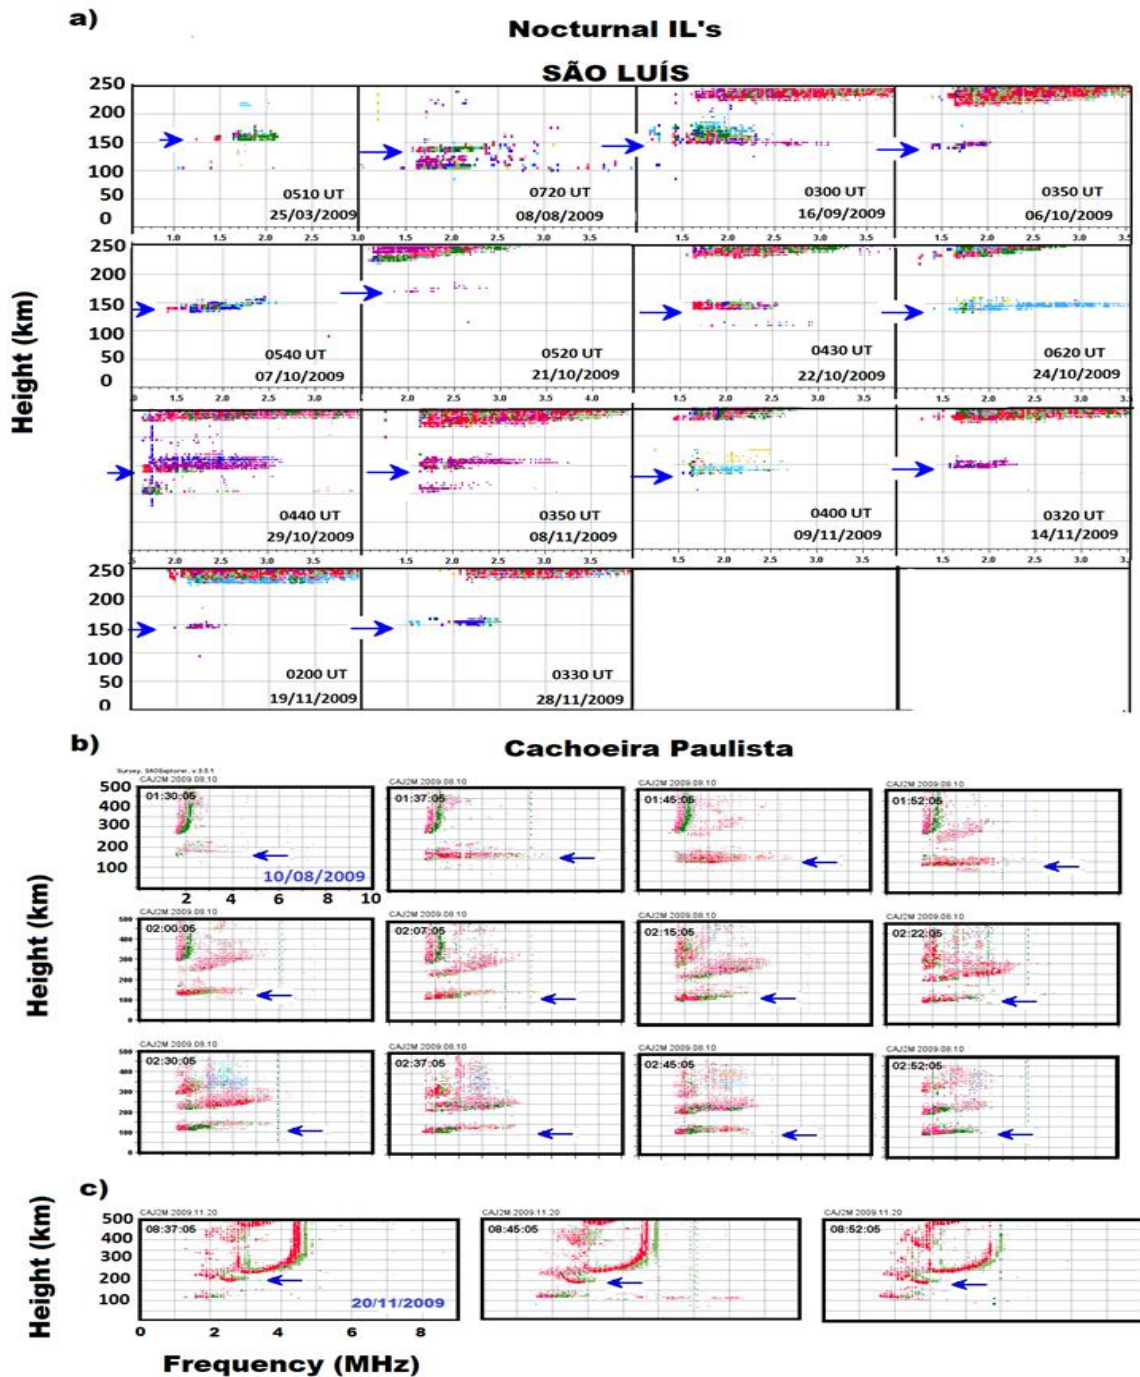

**FIGURE 7:** a) Ionograms from São Luís showing some examples of nocturnal intermediate layers on different days. b) Nocturnal intermediate layer over Cachoeira Paulista during August, 10. c) Nocturnal intermediate layer over CP starting with a retardation in height similar to that of the h-type sporadic layer.

Over Cachoeira Paulista also the nocturnal intermediate layers were registered. The highest occurrence [turned out to be in](#) June and October (5 days in both months). Figure 7b shows an example of this type of layer on 10 August. At around 0130 UT we can observe the starting of an IL at ~150 km. The subsequent sequence of ionograms shows that the IL rapidly descended to ~ 110 km of height. The range spreading characteristic of the IL was observed also in the nocturnal IL's, which in this case presented a range of ~ 50 km. On the other hand, a different shape was found for the IL on 20 November, starting at 0837 UT, as shown in Fig. 7c. We can observe at 200 km a curved format like that of the 'h' type Es-layer. The sequence (not presented completely here) shows that this layer descent was only a few  
10 kilometers and at 1037 UT it was already connected to the F1 layer.

As mentioned by [Lee et al. \(2003\)](#), the detection of nocturnal intermediate layers may be influenced by a limitation in the Digisonde, when the plasma frequency of the IL becomes lower than the lowest sounding frequency (1MHz), or when a blanketing is caused by an underlying Es layer (I/f type). Over Arecibo, a middle latitude location, for example, the nocturnal IL is a very common  
15 phenomenon ([Shen et al. 1976](#); [Osterman et al. 1994](#)). [Rodger et al. \(1981\)](#) also reported the presence of nocturnal IL's over South Georgia. The authors mentioned that the behavior of the F-layer some time before the occurrence of the IL suggested that the ionization increase observed in the valley region resulted from a downward transport of the F layer probably due to the solar semidiurnal tide. According to them, the probability of occurrence of the IL's is very low when the F layer base height is higher than  
20 220 km, but increases rapidly as it falls towards lower altitudes. As shown in the examples of Fig. 7, in

almost all the cases for SL, for example, we noted that the F layer was located at ~ 225 km, but there are some exceptions, like on 25 March, 8 Aug. and 7 Oct. In those cases, the F region was slightly above 250 km. Over CP, the nocturnal layers had similar characteristics. On 10 Aug., we can see clearly that the descent of the intermediate layer occurred during an ascending of the F layer until 02 UT. It is interesting to note also the similarity of the IL during this day with the sporadic-E layer with high range spreading formed due to particle precipitation (a-type Es layer).

### 3.3 Multiple IL's and those that are connected to the F region

Besides the occurrence of simultaneous IL's, we identify some cases in which the formation of the IL's was connected to the F region. They are: a) intermediate layers formed at the high frequency end of the F1 layer (IL'F1t), b) IL's formed from a detachment of the F1 layer base (IL'F1b), c) IL's formed from a perturbation in the F2 layer base (IL'F2b), and d) ascending IL's that reached the base of F2 layer. Among the above cited, the most common case observed at both São Luís and Cachoeira Paulista was that in which the layers formed from a detachment of the F1 layer base.

Figure 8 shows an example of ascending intermediate layer over SL that was located initially at ~ 130 km. At 11 UT, this layer presented a weakening followed by an intensification after 10 minutes. Between 1020 and 1120 UT, we can observe an ascending movement of the IL (from 132.9 to 153.5 km) and the subsequent merging with the F1 layer at 1130 UT. From this time on, an extra ionization at the high frequency end of the F1 layer with an ascending structure was observed and attained the F2 layer

base at 1230 UT (370 km). It is also interesting to note the changes that occurred in the F2 layer trace during this period.

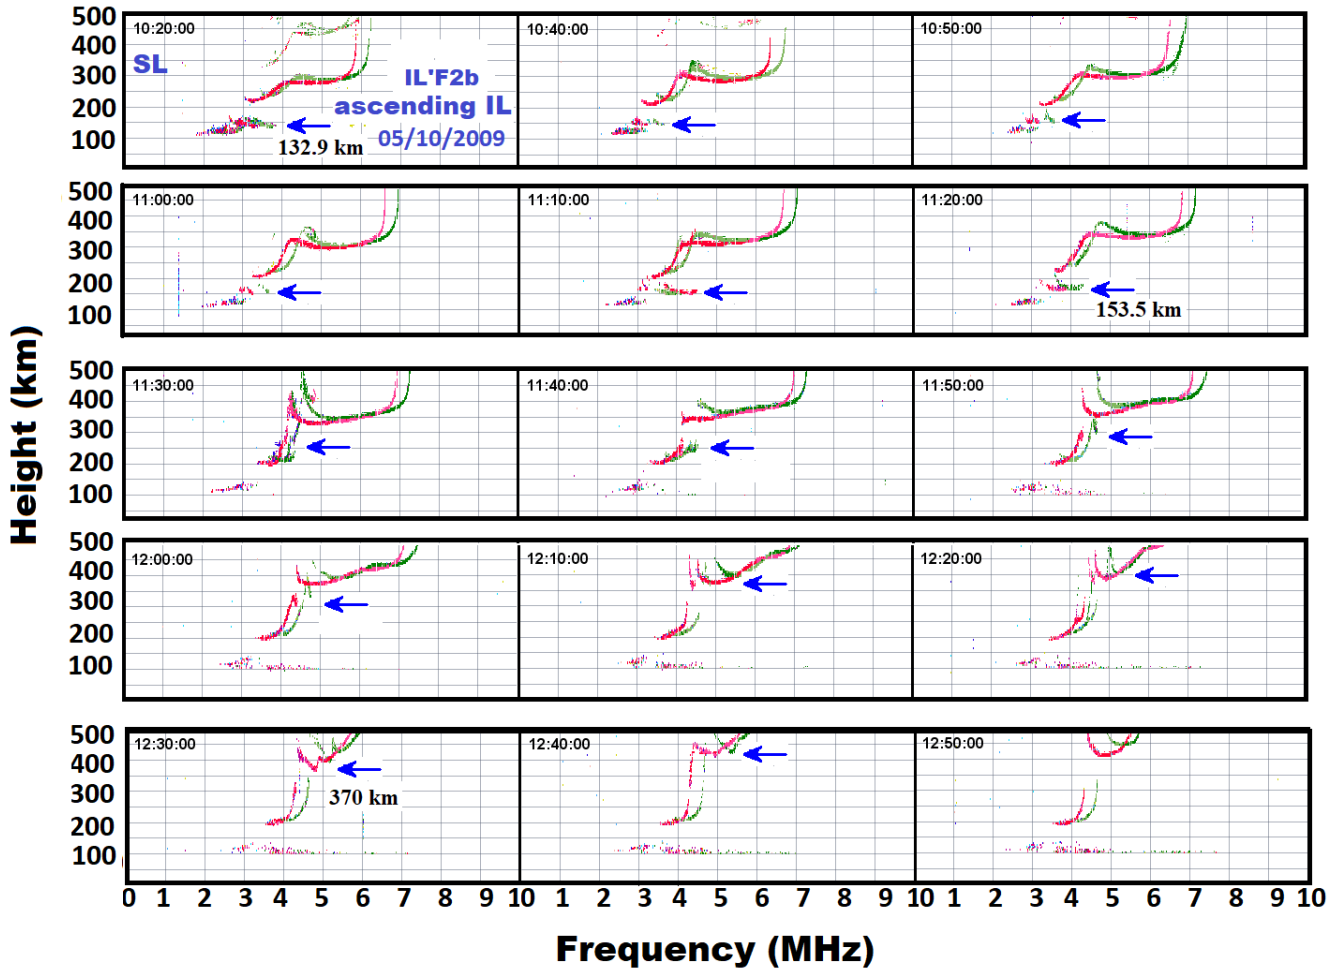

**FIGURE 8:** Sequence of ionograms taken during 1020 – 1250 UT on 05 October 2009 showing the presence of ascending intermediate layers over São Luís. The blue arrow indicates more clearly the raise of IL.

5

Using radar data, some authors have shown also ascending movement of the layer located at ~ 150 km (see for example de Paula et al. (2004), Patra et al. (2007) and Li et al. (2013)), but hardly any discussion about them has been made until now. In order to understand the cause of this layer rise, we plotted in Figure 9 some parameters of the F layer and IL during this day (05 Oct. 2009). In the first panel

are presented the F-layer virtual height ( $h'F$ ), the F1 and F2 layer peak heights ( $hmF1$ ,  $hmF2$ ), and the minimum virtual height of the IL trace ( $h'IL$ ). The second panel shows the band-pass filtered oscillations in F layer true height at specific plasma frequencies (4.1, 4.2, 4.3 and 4.4 MHz), as observed by the Digisonde. They are plotted with their base values displaced by 5 km (cumulatively) at each frequency.

5 The last two panels present the distribution of the tropospheric convective zones as obtained from the GOES satellite above Brazil at 07 and 08 UT. We may note that at  $\sim 1115$  UT, the IL height starts to increase going from 130 to 350 km in an interval of one hour. At the same time, the  $hmF2$  parameter is also intensified. A gravity wave manifestation in the form of oscillations in F layer true heights can be in part responsible for the raise of the IL. The lower two panels show images of the convective zones (with

10 the temperatures below  $-60^\circ\text{C}$ ) around São Luis ( $\sim 700$  and  $1000$  km of distance) taken some hours before the increase in the height of IL (07 - 08 UT), which give some support to the idea about the role of gravity waves. According to Vadas and Fritts (2004), the gravity waves excited by convective systems can have strong impacts in the atmosphere at high altitudes due to the fact that they have long vertical wavelengths and propagate in all directions from the convection source. However, the increase in the AE index from

15 25 to 175 nT at 1130 UT, appears to have produced some effect through the action of a prompt penetration electric field with eastward polarity in the behavior of the F layer height at this time.

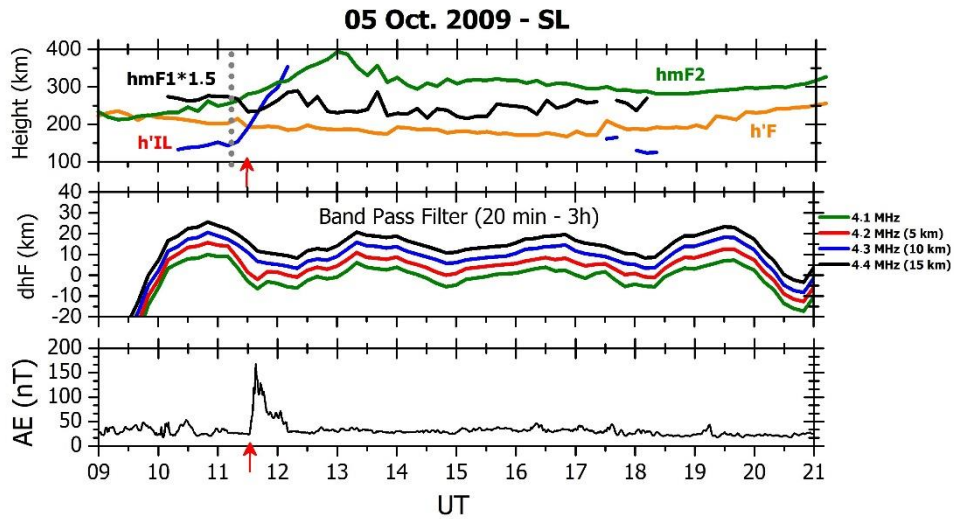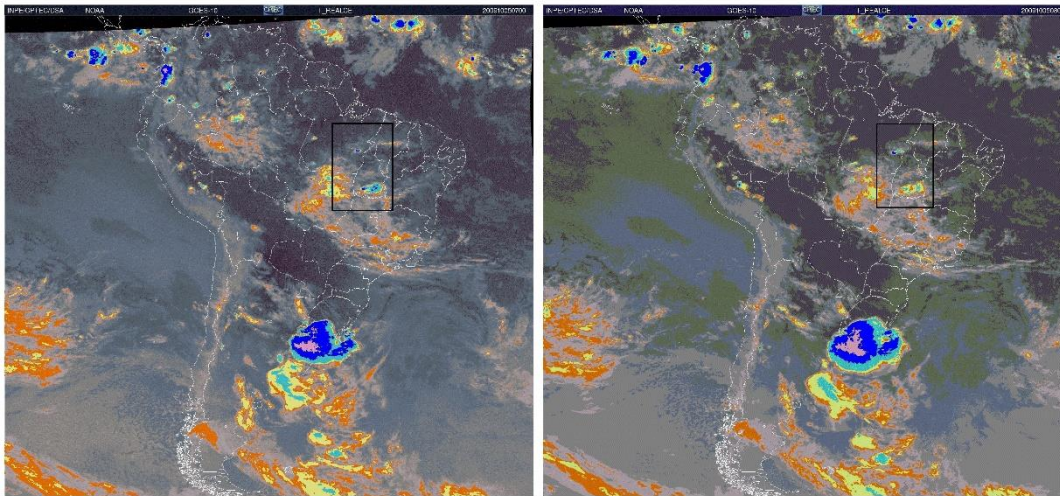

5 **FIGURE 9** – Ascending intermediate layer over SL during 5 Oct. The first panel (from top to bottom) shows the virtual height of the F layer ( $h'F$ , gray line), the F1 and F2 layer peak ( $hmF1$  and  $hmF2$ , black and green lines) and the virtual height of IL's ( $h'IL$ , red line). The  $hmF1$  parameter was multiplied by a factor of 1.5. The middle panel shows the Band-pass filtered (for 20 min. to 3h periods) height oscillations at frequencies 4.1 to 4.4 MHz. The third panel shows the auroral activity index AE indicating the possible influences of prompt penetration electric field. Images from GOES satellite for 07 and 08 UT showing the convective zones near to São Luis (as indicated by the black rectangle) is shown in the last panel.



The sequence of ionograms in Figure 8 shows that on 05 Oct., the IL initially detected at ~130 km, attained first the F1 layer until it progressed to the F2 layer base. During this interval, considerable modifications, like a bifurcation on the trace (see for example the ionogram from 1210 UT) was seen mainly in the F2 layer. As mentioned by Abdu et al. (1982), distortions like this in the F layer trace can be a result of ionospheric disturbances induced by the atmospheric gravity waves. Besides that, our study concerned a period in which the ionosphere was considerably contracted due the extremely low level of solar fluxes (UV, EUV and X-rays) (Heelis et al., 2009 and Liu et al., 2011). Balan et al. (2012) mentioned that, under these conditions, and considering the absence of severe magnetic disturbances, the tides and waves originating in the lower atmosphere can be expected to register their effects in the thermosphere and ionosphere more easily. In agreement with Essien et al. (2018), the occurrence of small (SSGW) and medium (MSGW) scale gravity waves over São João do Cariri from 2000 to 2010, was higher in 2009 followed by 2008. During 2009, 289 events of SSGW and 66 events of MSGW were identified on 199 nights of observations (175 with a clear-sky and 24 with clouds). These results are very interesting in that they reveal the special conditions of the coupling between the atmospheric layers during this period of the deep solar minimum activity.

A reverse situation appears to be present in the ionograms in Figure 10. As indicated by the blue arrows, an initial perturbation in the F2 layer base was observed at 1540 UT, around 400 km. At 1630 UT, this disturbance had already reached the F1 layer (~ 350 km). The ionograms show clearly a downward movement of this stratification. At 1810 UT, the IL's was already located at ~ 170 km. It is also interesting to note the presence of a second intermediate layer (as indicated by purple arrow) that was in progress when a disturbance in the F2 layer was identified. This second layer also presented a

downward movement and oscillated between moments of intensification and weakening, thus denoting the high complexity involved in the behavior of these layers.

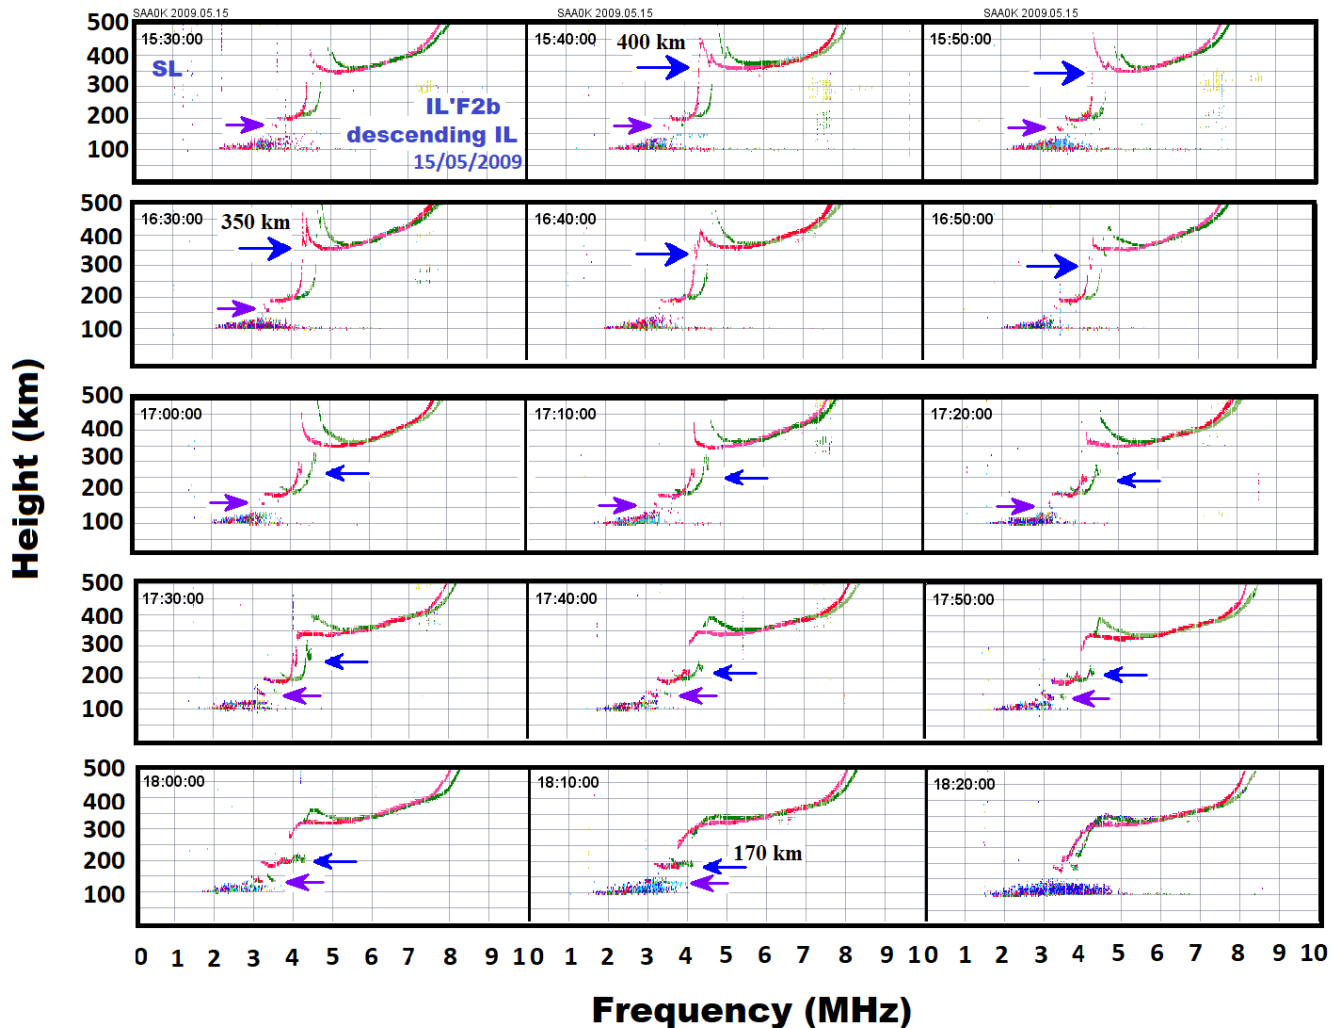

**FIGURE 10:** Sequence of ionograms taken during 1530 – 1820 UT on 15 May 2009 showing the perturbation in the F2 layer trace that reached low altitudes and evolved to a descending intermediate layer over São Luís. The blue arrow indicates the downward movement of perturbation in F layer and the purple arrow indicates the presence of another IL occurring simultaneously.

Figure 11 shows an example of multiple intermediate layers over CP. We may note that at 1407 UT there is an IL at ~ 170 km (indicated by the blue arrow) and another at 150 km (indicated by the purple arrow). In both cases, there is a very slow descent movement or nearly a stagnation of the layer at a specific height. The presence of these two layers was verified until 1722 UT (not shown here). At 1730 UT the two layers merged at ~130 km. After that, only a single layer was observed till 21 UT.

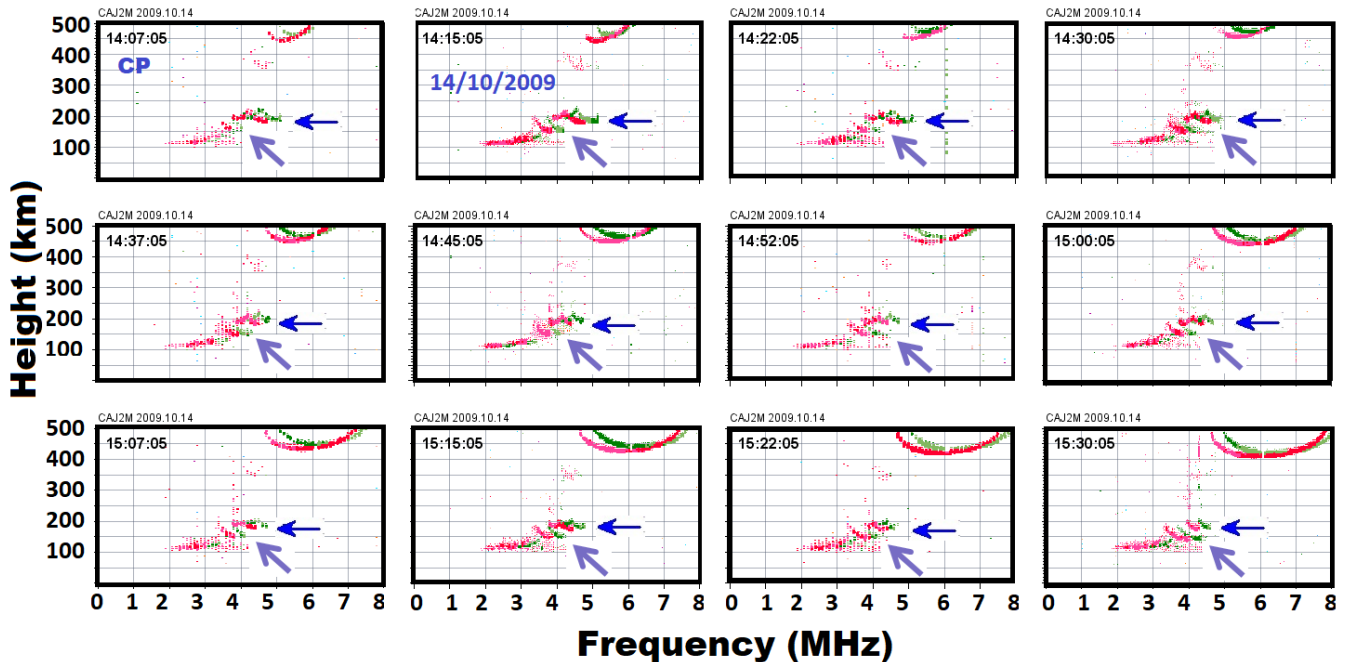

**FIGURE 11:** Sequence ionograms over CP showing the presence of simultaneous intermediate layer, one being initially detected in 180 km height and other in 150 km.

10 The occurrence of intermediate layer from a detachment of the F1 layer was the most common case found in our study. The ionograms in Figure 12 show that at 1715 UT on 18 March, the F1 layer base exhibited a deformation (stratification), which extended to the following times. This deformation showed a clear detachment from the F1 layer at 1730 UT, reaching the height of ~ 150 km at 19 UT. It is important to mention that in many other cases, a deformation in the F1 layer base was registered, however

the total detachment did not occur or occurred only later. Besides that, there were some cases in which the detachment was verified, but after some time the detached part joined to the F1 layer again.

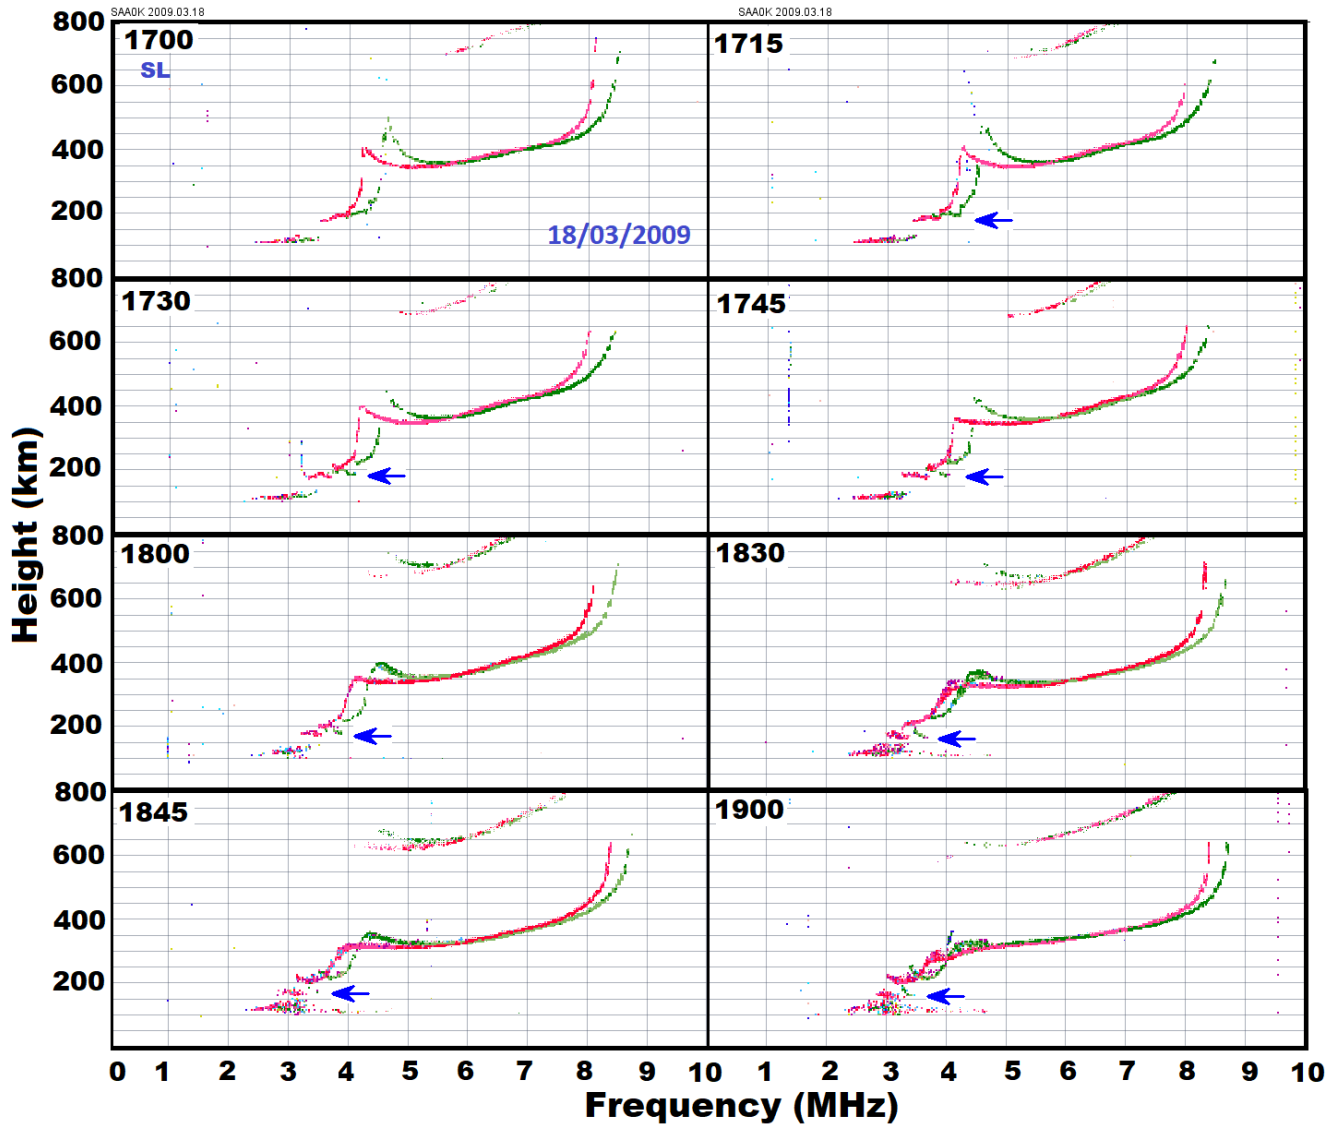

FIGURE 12: Sequence of ionograms from SL during 18 March 2009 showing the formation of an intermediate layer from a detachment of F1 layer base.

5

The F-layer trace distortion was a frequent feature seen in our data. Figure 13 shows some examples of ionograms over the equatorial station SL and the low latitude station CP in Brazil. Large modifications in the F1 and F2 layers were noted, not only as bifurcations as previously mentioned, but also in the form of forking traces in both F1 and F2 layer, besides other modifications that were not very well defined. The ionograms from 13 Oct. (SL), 08 Dec. (CP) and 5 Oct. (SL) show some examples of the presence of forking trace. Note that the last example corresponds to the same day for which the case study was presented in Figure 8. The Digisonde registered this feature over Cachoeira Paulista for more than 2 hours. On 23 July, some interesting aspects also may be noted. At 1707 UT, well-defined F1 and F2 layers can be noticed. Eight minutes later, structuring of the F2 layer was considerably modified. The critical frequency reduced from  $\sim 7$  to 5.5 MHz, however the more interesting modifications were verified at 1730 UT, when the F2 layer detached from the F1 layer and rose by  $\sim 120$  km. The sequence of ionograms (not presented here) shows that the F1 layer was transformed into a descending intermediate layer, as expected. A strong uplift of the layer in a short time scale is generally caused by a prompt penetration electric field (Abdu et al. 2009; Santos et al. 2012; Santos et al. 2016) but, in this case, the interplanetary magnetic field was weakly to south ( $\sim -2$  nT) and in its recovering phase. The AE and Dst indices were 150 nT (recovery phase) and -23 nT, respectively. In this scenario, we do not believe that this distortion and uplifting of the layer were caused by a penetration of electric field, because the overshielding electric field (based in AE recovery), which is westward in this case should make the layer go down and not rise as observed. Therefore, it is highly probable that this modification in the F2 layer and the subsequent formation of the IL was caused by a gravity waves propagation. Some oscillations were also observed over SL (not showed here), with a forking trace observed at 21 UT. Figure 13 shows other

common examples of distortions occurring in the F1 layer. Oscillations in F layer height like that is present on 18 Aug. generally evolve into an intermediate layer detached from the F1 layer base. In another example, on 13 April, a different aspect was noted at the high frequency end of the F1 layer. In the course of time, this characteristic that appeared to be an extra ionization evolved to a descending intermediate layer that attained heights below 130 km, for example.

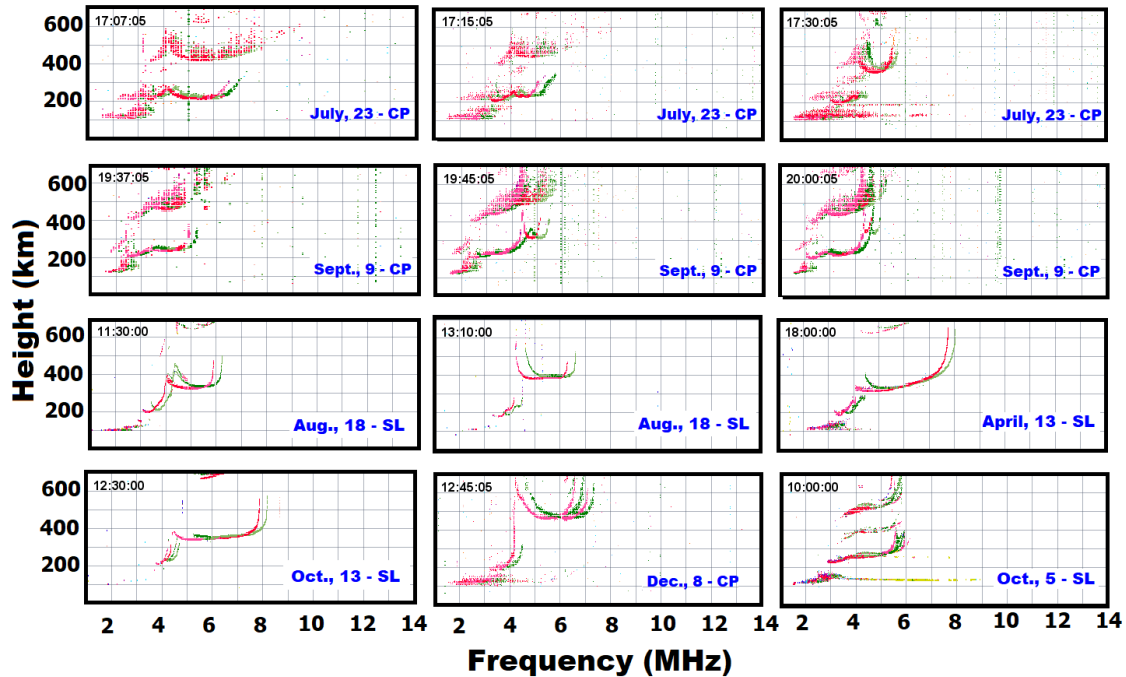

**FIGURE 13:** Ionograms showing the possible manifestation of gravity waves in the intermediate layer at equatorial (SL) and low latitude (CP) regions.

### 10 3.4 Intermediate layers descent velocities

The calculated mean descent velocities of the IL's for each day is presented in Figure 14, in which we may note a day-to-day variability in the wave shape (obtained from the B-spline analysis represented

by the red curve) possibly indicating some influence of gravity waves in the formation process of the intermediate layers. The drift values obtained here are in agreement with that was presented in Ninranjan et al. (2010). These authors showed a case in which the IL was observed in two different intervals on the same day. In the first interval, the initial descending velocity was around 20 km/h, which decreased to 6 km/h towards the end. In the second interval, the velocity was quite high being 40 km/h in the first 15 min and decreasing to 8 km/h before it merged with the normal E layer. The daily velocities plotted in Figure 14 were used to calculate the mean velocity for each month, which is shown in Fig. 15. We may note that the velocities over CP oscillated between ~ - 13 and -23 km/h, whilst the velocities over SL varied from -18 to -30 km/h. It is interesting to note that the velocities in SL and CP show similar behavior from March to May. From May to June, a decrease/increase in the drift over SL/CP was observed. During June and July months, the velocities over both sites were very similar, but later clear anti correlation between the velocities can be noted.

# CACHOEIRA PAULISTA - 2009

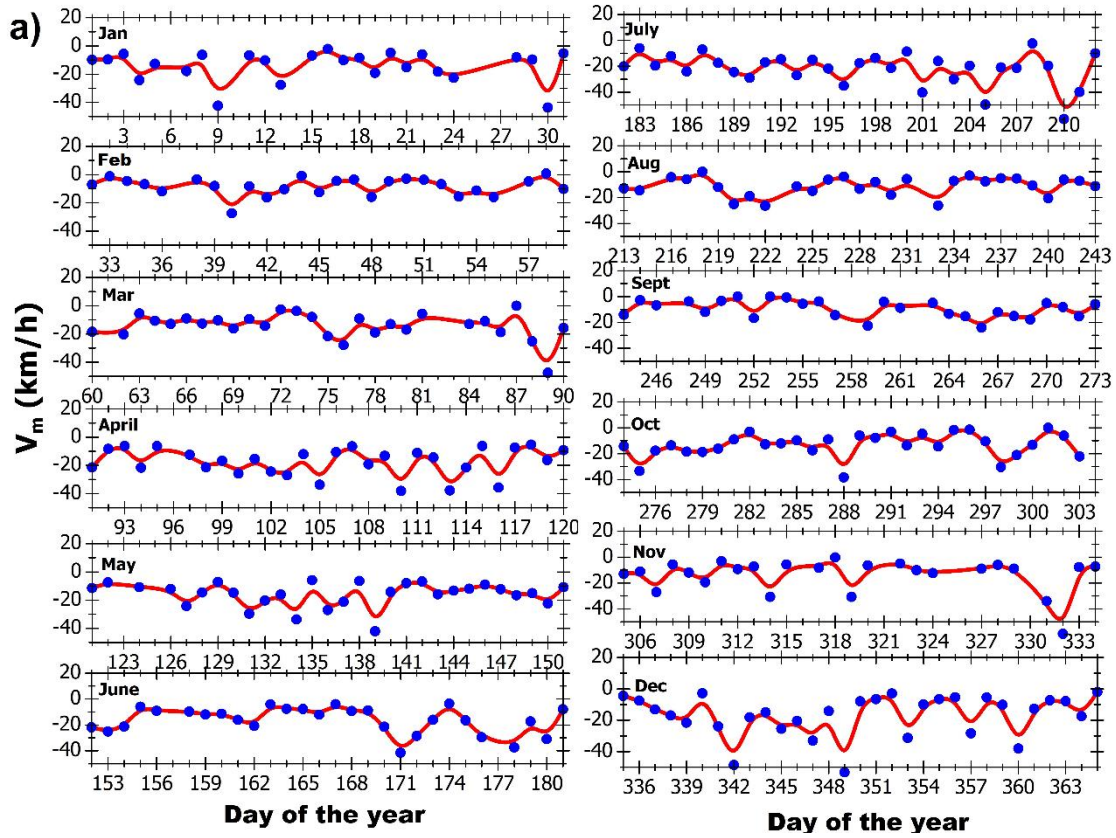



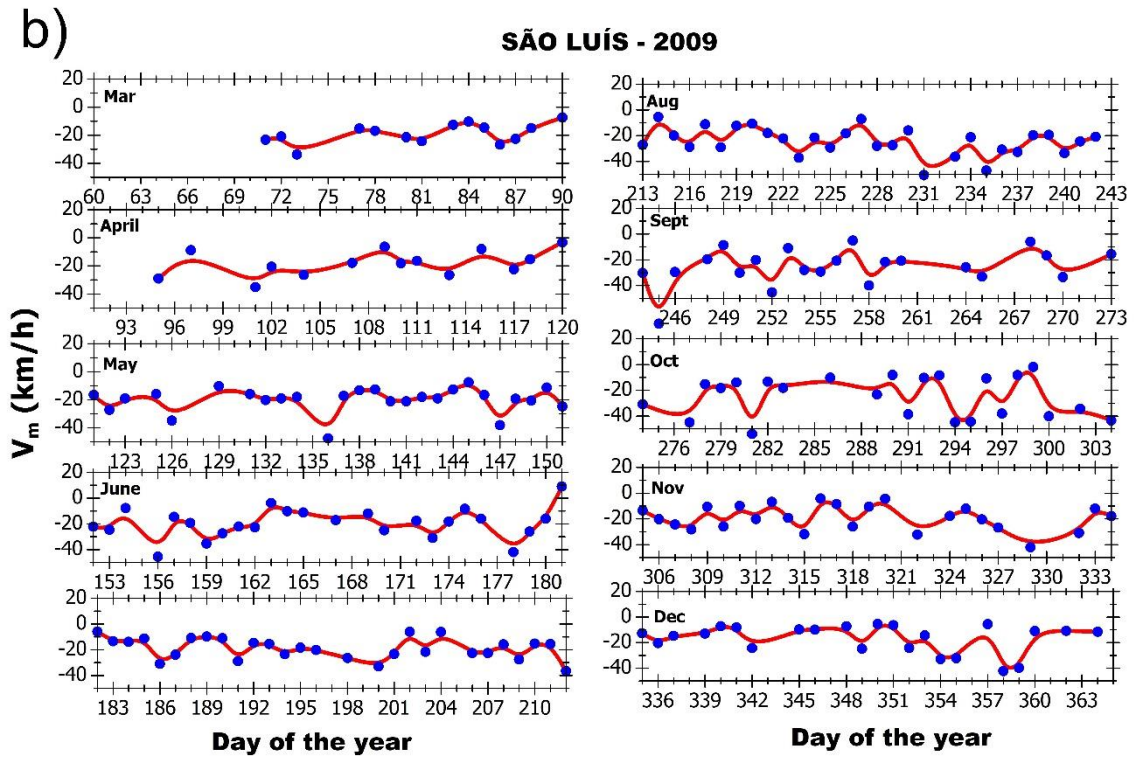

**FIGURE 14:** a) The average descending velocity of intermediate layers for CP and b) for SL.

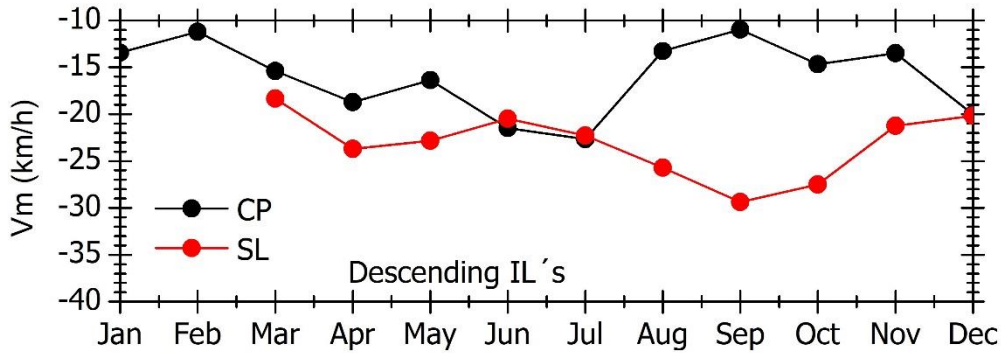

**FIGURE 15:** The monthly average descending velocity of intermediate layers for CP and SL.

## 5. Conclusions

In this work, we have presented for the first time the climatology of the 150 km echoes, or descending intermediate layers, over the equatorial and low latitudes regions in Brazil during the extended solar minimum of 2009. The occurrence of the descending layers predominantly during daytime (Figure 5) appears to suggest an important role played by the E-layer dynamo in the dynamics of these descending layers. The present results would suggest that this layer has a high probability of occurrence at low latitudes. The ftIL parameter presents a behavior similar to that of the normal E layer critical frequency, with a maximum intensity at ~12 LT. The study realized here appears to reveal that the high occurrence rate of the IL was not related to its seasonality. Further peculiarities on the layer occurrence were found, such as, the presence of nocturnal layers, multiple IL's, ascending IL's and also their formation from a detachment of the F1 layer base. It was shown from Fourier analysis that the dynamics of the IL's over Brazilian region is dominated by the diurnal tide, followed by the semidiurnal, terdiurnal and quarterdiurnal tides. Additionally, the atmospheric gravity waves propagation and the prompt penetration of magnetospheric electric fields to equatorial latitude may also influence the dynamics of IL's.

## Acknowledgments

Ângela M. Santos acknowledges the Fundação de Amparo à Pesquisa do Estado de São Paulo – FAPESP for the financial support under grant 2015/25357-4. The Digisonde data from Brazil may be acquired by contacting the responsible coordinators at DAE/INPE (Inez S. Batista; e-mail:

inez.batista@inpe.br). One of us (JHAS) has CNPq grant number 303741/2014-7. The auroral indices were obtained from the website [https://omniweb.gsfc.nasa.gov/form/omni\\_min.html](https://omniweb.gsfc.nasa.gov/form/omni_min.html). The images from GOES satellite were downloaded from the site: <http://satelite.cptec.inpe.br/acervo/goes16.formulario.logic>.

5

## References

- Abdu, M. A., Batista, I. S., Kantor, I. J., and Sobral, J. H. A.: Gravity Wave Induced Ionization Layers in the Night F-Region at Low Latitudes, *J. Atmos. Terr. Phys.*, 44, 759–767, [https://doi.org/10.1016/0021-9169\(82\)90004-6](https://doi.org/10.1016/0021-9169(82)90004-6), 1982.
- 10 Abdu, M. A., E. A. Kherani, I. S. Batista, and J. H. A. Sobral, Equatorial evening prereversal vertical drift and spread F suppression by disturbance penetration electric fields, *Geophys. Res. Lett.*, 36, L19103, <https://doi:10.1029/2009GL039919>, 2009.
- Andrioli, V. F.; Batista, P. P.; Clemesha, B. R.; Schuch, N. J. Analysis of mean winds and atmospheric tides at middle and lower latitudes in South Hemisphere. In: IAGA 2009, Sopron, Hungary, (Conference
- 15 Paper), 2009a.
- Andrioli, V.F. ; Clemesha, B.R. ; Batista, P.P. ; Schuch, N.J. . Atmospheric tides and mean winds in the meteor region over Santa Maria (29.7°S; 53.8°W). *Journal of Atmospheric and Solar-Terrestrial Physics*, v. 71, p. 1864-1876, 2009b.
- Appleton, E.V., Fine-Structure of the Ionosphere, *Nature* 131, 872-873, 1933.

- Balsley, B. B., Evidence of stratified echoing region at 150 km in the 367 vicinity of magnetic equator during daylight hours, *J. Geophys. Res.*, 69 , 368-1925, <https://doi.org/10.1029/JZ069i009p01925>, 1964.
- Batista, P.P., Clemesha, B.R., Tokumoto, A.S., Lima, L.M.: Structure of the mean winds and tides in the meteor region over Cachoeira Paulista, Brazil (22:7°S; 45°W) and its comparison with models. *J. Atmos. Sol.-Terr. Phys.* 66, 623–636. <http://dx.doi.org/10.1016/j.jastp.2004.01.014>, 2004.
- Buriti, R. A. ; Hocking, W. K. ; Batista, P. P. ; Medeiros, A. F. ; Clemesha, B. R. . Observations of equatorial mesospheric winds over Cariri (7.4°S) by a meteor radar and comparison with existing models. *Annales Geophysicae*, v. 26, p. 485-497, 2008.
- 10 Chau, J. L. and Kudeki, E.: Statistics of 150-km echoes over Jicamarca based on low-power VHF observations, *Ann. Geophys.*, 24, 1305–1310, <https://doi:10.5194/angeo-24-1305-2006>, 2006.
- De Paula, E. R., and D. L. Hysell, The São Luís 30 MHz coherent scatter ionospheric radar: System description and initial results, *Radio Sci.*, 39 , RS1014, <https://doi:10.1029/2003RS002914>, 2004.
- Essien, P., Paulino, I., Wrasse, C. M., Campos, J. A. V., Paulino, A. R., Medeiros, A. F., Buriti, R. A.,
- 15 Takahashi, H., Agyei-Yeboah, E., and Lins, A. N.: Seasonal characteristics of small- and medium-scale gravity waves in the mesosphere and lower thermosphere over the Brazilian equatorial region, *Ann. Geophys.*, 36, 899-914, <https://doi.org/10.5194/angeo-36-899-2018>, 2018.
- Fujitaka, K., And T. Tohmatsu, A tidal theory of the ionosphere intermediate layer, *d. Atmos. Terr. Phys.*, 35, 425-438, [https://doi.org/10.1016/0021-9169\(73\)90034-2](https://doi.org/10.1016/0021-9169(73)90034-2), 1973.

- Heelis, R. A., W. R. Coley, A. G. Burrell, M. R. Hairston, G. D. Earle, M. D. Perdue, R. A. Power, L. L. Harmon, B. J. Holt, and C. R. Lippincott, Behavior of the O<sup>+</sup>/H<sup>+</sup> transition height during the extreme solar minimum of 2008, *Geophys. Res. Lett.*, 36, L00C03, <https://doi.org/10.1029/2009GL038652>, 2009.
- Kudeki, E. and Fawcett, C. D.: High resolution observations of 150km echoes at Jicamarca, *Geophys. Res. Lett.*, 20, 1987–1990, <https://doi.org/10.1029/93GL01256>, 1993.
- Kudeki, E., Fawcett, C. D., Ecklund, W. L., Johnston, P. E., And Franke, S. J.: Equatorial 150-km Irregularities Observed at Pohnpei, *Geophys. Res. Lett.*, 20, 1987–1990, <https://doi.org/10.1029/1998GL900069>, 1998.
- Lee, C.-C., Liu, J.-Y., Pan, C.-J., and Hsu, H.-H.: The intermediate layers and associated tidal motions observed by a Digisonde in the equatorial anomaly region, *Ann. Geophys.*, 21, 1039-1045, <https://doi.org/10.5194/angeo-21-1039-2003>, 2003.
- Li, G., B. Ning, A. K. Patra, M. A. Abdu, J. Chen, L. Liu, And L. Hu, On the linkage of daytime 150 km echoes and abnormal intermediate layer traces over Sanya, *J. Geophys. Res. Space Physics*, 118, 7262–7267, <https://doi.org/10.1002/2013JA019462>, 2013.
- 15 [Lima, Lourivaldo Mota ; Paulino, Ana Roberta S. ; Medeiros, Amauri F. ; Buriti, Ricardo A. ; Batista, Paulo P. ; Clemesha, Barclay R. ; Takahashi, Hisao . First observation of the diurnal and semidiurnal oscillation in the mesospheric winds over São João do Cariri-PB, Brazil. \*Revista Brasileira de Geofísica\*, v. 25, p. 35-41, 2007.](#)
- Liu, L., Y. Chen, H. Le, V. I. Kurkin, N. M. Polekh, and C.-C. Lee, The ionosphere under extremely  
20 prolonged low solar activity, *J. Geophys. Res.*, 116, A04320, <https://doi.org/10.1029/2010JA016296>, 2011.

- Macdougall, J.W., 110 km neutral zonal wind patterns, *Planet. Space Sci.*, 22, 545, [https://doi.org/10.1016/0032-0633\(74\)90089-0](https://doi.org/10.1016/0032-0633(74)90089-0), 1974.
- Macdougall, J. W. Seasonal variation of semidiurnal winds in the dynamo region. *Planetary and Space Science*, v. 26, n. 8, p. 705-714, [https://doi.org/10.1016/0032-0633\(78\)90001-6](https://doi.org/10.1016/0032-0633(78)90001-6), 1978.
- 5 Mathews, J., and F. Bekeeny, Upper atmosphere tides and the vertical motion of ionospheric sporadic layers at Arecibo, *J. Geophys. Res.*, 84(A6), 2743–2750, <https://doi.org/10.1029/JA084iA06p02743>, 1979.
- Mathews, J.D. Sporadic E: current views and recent progress, *J. Atmos. Sol.-Terr. Phys.*, 60, 413, [https://doi.org/10.1016/S1364-6826\(97\)00043-6](https://doi.org/10.1016/S1364-6826(97)00043-6), 1998.
- 10 Nanan B., C. Y. Chen, P. K. Rajesh, J. Y. Liu, and G. J. Bailey, Modeling and observations of the low latitude ionosphere-plasmasphere system at long deep solar minimum, *J. Geophys. Res.*, 117, A08316, <https://doi:10.1029/2012JA017846>, 2012.
- Niranjan, K. Srivani, B. Naidu, V. V. S. Daytime descending intermediate layers observed over a sub-tropical Indian station Waltair during low-solar activity period, *Ann. Geophys.*, 28, pp. 807-815, 15 [https://doi: 10.5194/angeo-28-807-2010](https://doi:10.5194/angeo-28-807-2010), 2010.
- Osterman, G.B., R.A. Heelis, G.J. Bailey, Modeling the formation of intermediate layers at Arecibo latitudes, *J. Geophys. Res.*, 99, pp. 11357-11365, [https://doi: 10.1029/94JA00519](https://doi:10.1029/94JA00519), 1994.
- Patra, A. K., and N. V. Rao, Further investigations on 150-km echoing riddle using simultaneous observations of 150-km and E region echoes from off-electrojet location Gadanki, *J. Geophys. Res.*, 112, 20 A09301, [doi:10.1029/2006JA012204](https://doi:10.1029/2006JA012204), 2007.

Ratcliffe, J. A. and White, Fine-Structure of the Ionosphere, 131, 873, <https://doi.org/10.1038/131872a0>, 1933.

Resende, L. C. A., Batista, I. S., Denardini, C. M., Batista, P. P., Carrasco, A. J., Andrioli, V. F., and Moro, J., Simulations of blanketing sporadic E-layer over the Brazilian sector driven by tidal winds. *Journal of Atmospheric and Solar-Terrestrial Physics*. <https://doi.org/10.1016/j.jastp.2016.12.012>, 2017a.

Resende, L. C. A., Batista, I. S., Denardini, C. M., Batista, P. P., Carrasco, A. J., Andrioli, V. F., and Moro, J.: The influence of tidal winds in the formation of blanketing sporadic e-layer over equatorial Brazilian region, *J. Atmos. Sol.-Terr. Phys.*, 171, 64 – 71, <https://doi.org/https://doi.org/10.1016/j.jastp.2017.06.009>, 2017b.

Rodger, A. S., Fitzgerald, P. H., And Broom, S. M.: The nocturnal intermediate layer over South Georgia, *J. Atmos. Terr. Phys.*, 43, 1043–1050, [https://doi.org/10.1016/0021-9169\(81\)90018-0](https://doi.org/10.1016/0021-9169(81)90018-0), 1981.

Rodrigues, F. S., De Paula, E. R., And Chau, J. L.: On the characteristics of 150-km echoes observed in the Brazilian longitude sector by the 30 MHz São Luís radar, *Ann. Geophys.*, 29, 1905-1916, <https://doi:10.5194/angeo-29-1905-2011>, 2011.

Santos, A. M., M. A. Abdu, J. H. A. Sobral, D. Koga, P. A. B. Nogueira, and C. M. N. Candido, Strong longitudinal difference in ionospheric responses over Fortaleza (Brazil) and Jicamarca (Peru) during the January 2005 magnetic storm, dominated by northward IMF, *J. Geophys. Res.*, 117, A08333, <https://doi:10.1029/2012JA017604>, 2012.

- Santos, A. M., Abdu, M. A., Souza, J. R., Sobral, J. H. A., and Batista, I. S.: Disturbance zonal and vertical plasma drifts in the Peruvian sector during solar minimum phases, *J. Geophys. Res. Space*, 121, 2503–2521, <https://doi.org/10.1002/2015JA022146>, 2016.
- Schafer, J. P. and Goodall, W.M., Characteristics of the Ionosphere, *Nature*, 131, 804,  
5 <https://doi.org/10.1038/131804a0>, 1933.
- Shen, J.S., Swartz, W.S., And Farley, D.T.: Ionization layers in the nighttime E-region valley above Arecibo, *J. Geophys. Res.*, 81, 5517-5526, <https://doi.org/10.1029/JA081i031p05517>, 1976.
- Szuszczewicz, E. P., R. G. Roble, P. J. Wilkinson, and R. Hanbaba, Coupling mechanisms in the lower ionospheric-thermospheric system and manifestations in the formation and dynamics of  
10 intermediate descending layers, *J. Atmos. Terr. Phys.*, 57, 1483, [https://doi.org/10.1016/0021-9169\(94\)00145-E](https://doi.org/10.1016/0021-9169(94)00145-E), 1995.
- Tong, Y., Mathews, J. D., and Ying, W.-P., An upper E region quarterdiurnal tide at Arecibo?, *J. Geophys. Res.*, 93(A9), 10047– 10051, <https://doi:10.1029/JA093iA09p10047>, 1988.
- Tsunoda, R. T.: Enhanced velocities and a shear in daytime  $E_{sq}$  over Kwajalein and their relationship to  
15 150km echoes over the dip equator, *Geophys. Res. Lett.*, 21, 2741–2744, <https://doi.org/10.1029/94GL02507>, 1994.
- Tsunoda, R. T. And Ecklund, W. L.: On a summer maximum in the occurrence frequency of 150-km (F1) radar echoes over Pohnpei, *Geophys. Res. Lett.*, 31, L06810, <https://doi:10.1029/2003GL018704>, 2004.
- Vadas, S. L. and Fritts, D. C.: Thermospheric responses to gravity waves arising from mesoscale  
20 convective complexes, *J. Atmos. Sol.-Terr. Phy.*, 66, 781–804, <https://doi.org/10.1016/j.jastp.2004.01.025>, 2004.



Yokoyama, T., Hysell, D. L., Patra, A. K., Otsuka, Y., And Yamamoto, M.: Daytime 150-km echoes observed with the Equatorial Atmosphere Radar in Indonesia: First results, *Geophys. Res.Lett.*, L06101, <https://doi:10.1029/2007GL033130>, 2009.

Wilkinson, P. J., E. P. Szuszczewicz, And R. G. Roble, Measurements and modeling of intermediate,  
5 descending, and sporadic layers in the lower ionosphere: Results and implications for global-scale  
ionospheric-thermospheric studies, *Geophys. Res. Lett.*, 19, 95, <https://doi.org/10.1029/91GL02774>,  
1992.
